# Supplementary material for: Architecture of Microcin B17 Synthetase: An Octameric Protein Complex Converting a Ribosomally Synthesized Peptide into a DNA Gyrase Poison
Source: PubMed Central journal article supplement — Mol Cell. 2019 Feb 21;73(4):749–762.e5. doi: 10.1016/j.molcel.2018.11.032 (PMC6395948; doi:10.1016/j.molcel.2018.11.032), 2019-02-21
Supplement: mmc1.pdf [file mmc1.pdf]

**Molecular Cell, Volume 73**

**Supplemental Information**

**Architecture of Microcin B17 Synthetase: An  
Octameric Protein Complex Converting a Ribosomally  
Synthesized Peptide into a DNA Gyrase Poison**

**Dmitry Ghilarov, Clare E.M. Stevenson, Dmitrii Y. Travin, Julia Piskunova, Marina Serebryakova, Anthony Maxwell, David M. Lawson, and Konstantin Severinov**

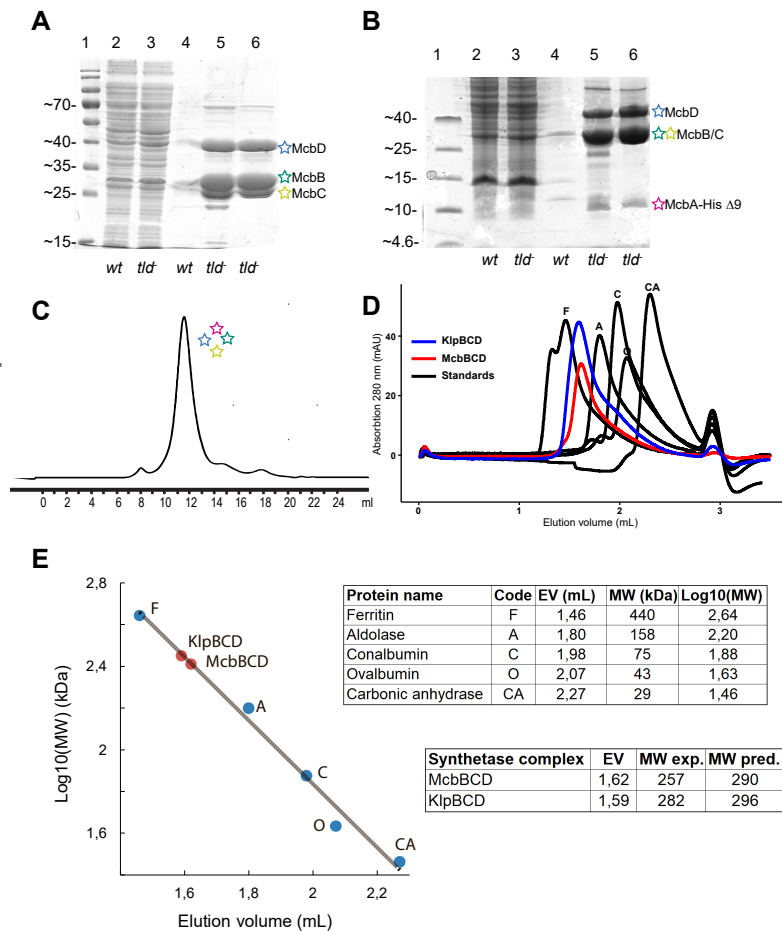

## Supplementary Figure S1. McbBCD complex purification. Related to Figure 2

**(A-C) McbBCD purification from  $\Delta$ *tld* cells.** **A.** A Tris-Glycine SDS-PAGE analysis of lysates and eluates from a Ni-NTA column. Lane 1, molecular weight marker. Lanes 2 and 3: lysates of control wild-type cells transformed with pBAD Ec-McB-His and *tld* mutant cells, respectively. Lanes 4 and 5: corresponding eluates from Ni-NTA resin. Lane 6: His-pro-MccB17-BCD complex after size exclusion chromatography (see C). The higher molecular weight band (ca. 70 kDa) is a contaminant. **B.** The identical samples (as A) were loaded onto a Tris-Tricine gel to resolve low MW components and a band corresponding to His-pro-MccB17 was now resolved. **C.** Gel-filtration (Superdex S200 Increase 10/300) trace of affinity-purified synthetase His-pro-MccB17-BCD complex, peak fraction loaded on denaturing gels with the protein marker (A-B). Coloured stars indicate components of His-Pro-MccB17-BCD complex; corresponding protein bands were analysed by MALDI-MS to confirm protein identity. **(D-E) Analytical SEC of McbBCD and KlpBCD complexes.** **A.** FPLC traces of purified McbBCD (red), KlpBCD (blue) and molecular weight standards (black) on Superdex 200 Increase 5/150. **B.** Calibration curve and  $M_w$  calculation for both BCD complexes.

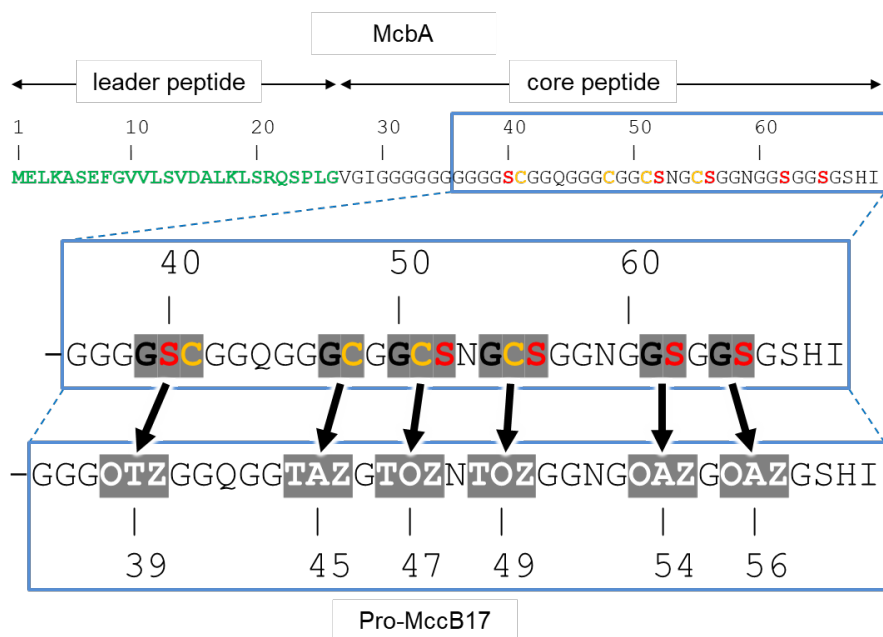

OAZ = oxazole – derived from Gly-Ser  
 TAZ = thiazole – derived from Gly-Cys  
 OTZ = oxazole-thiazole – derived from Gly-Ser-Cys  
 TOZ = thiazole-oxazole – derived from Gly-Cys-Ser

#### His-pro-MccB17

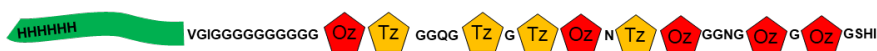

#### His-pro-MccB17 1-46

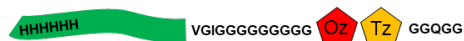

### Supplementary Figure S2. Nomenclature used for pro-MccB17 in McbBCD structures. Related to Figures 1 and 2

For the building and refinement of fragments of pro-MccB17 we treated the mono- and bis-heterocycles as pseudo-amino acids, which could then be incorporated into peptide fragments between standard amino acids. However, this affected the sequence numbering because the modifications conflate either two or three amino acids into one pseudo-amino acid, such that the final product becomes nine residues shorter. The revised numbering scheme is shown. Below are shown two peptide ligands used to obtain crystal structures, a full-length modified His-tagged McbA peptide and a truncated (McbA 1-46) peptide.

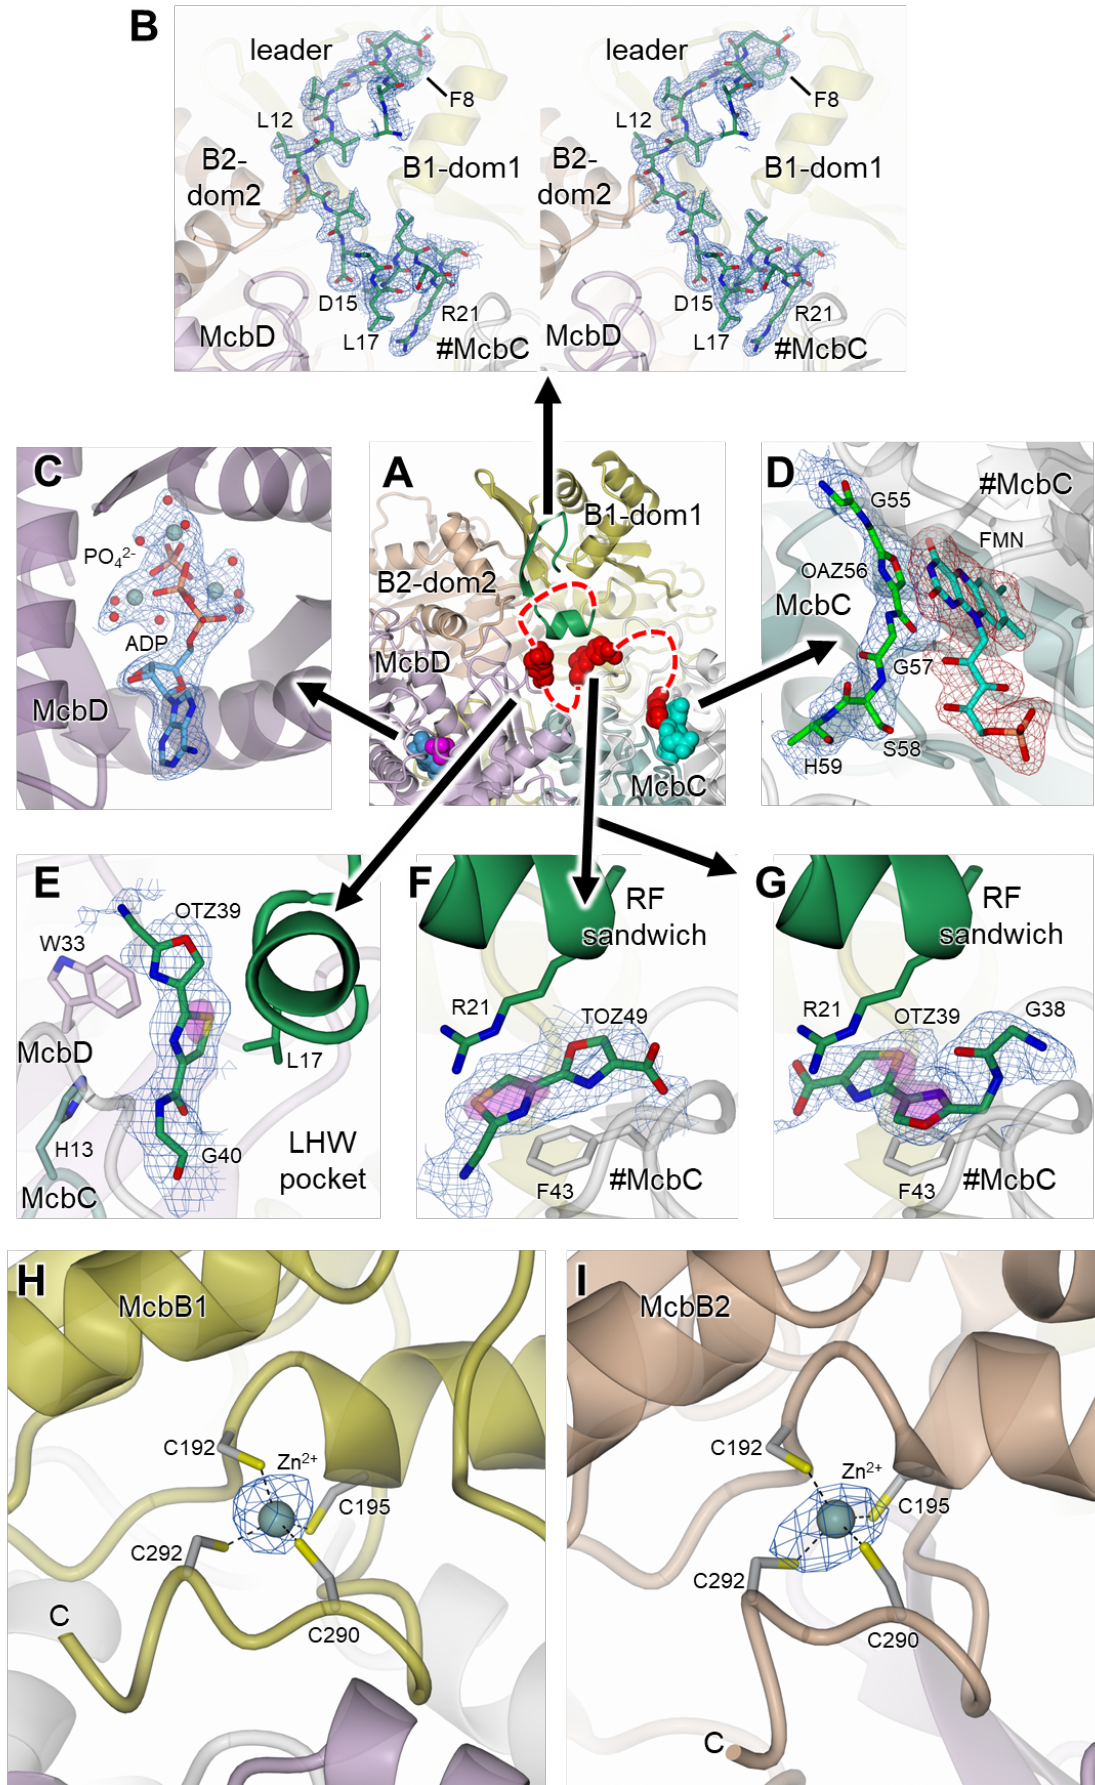

**Supplementary Figure S3. Omit difference density maps and anomalous difference Fourier map for zinc sites. Related to Figure 2**

Omit  $mF_{\text{obs}} - DF_{\text{calc}}$  difference electron density maps were generated for the bound ligands using phases from the final models without the ligands after the application of small random shifts to the atomic coordinates, re-setting temperature factors, and re-refining to convergence. **A.** Overview of sites represented in the rest of the figure, shown in the standard view (as in **Figure 2C**). **B.** Stereoview of density for the leader peptide in BCD-pB17 with key residues labelled (2.1 Å resolution omit density contoured at  $\sim 2.0 \sigma$ ). **C.** Density for ADP and phosphate together with associated magnesium ions and waters in BCD-pB17-ADP-P (2.35-Å resolution omit density contoured at  $\sim 3.5 \sigma$ ). **D.** Separate omit maps calculated for the product (blue mesh) and FMN (red mesh) in the McbC active site of BCD-pB17 (both calculated at 2.1-Å resolution and contoured at  $\sim 2.0 \sigma$ ). **E.** Density for the OTZ39-Gly40 ligand in the LHW pocket of BCD-pB17 [2.1 Å resolution omit density contoured at  $\sim 2.0 \sigma$  (blue mesh) and  $\sim 6.0 \sigma$  (magenta transparent surface)]. **F.** Density for the TOZ49 ligand in the RF sandwich of BCD-pB17 [2.1-Å resolution omit density contoured at  $\sim 1.8 \sigma$  (blue mesh) and  $\sim 6.0 \sigma$  (magenta transparent surface)]. **G.** Density for the Gly38-OTZ39 ligand in the RF sandwich of BCD-pB17short [1.85-Å resolution omit density contoured at  $\sim 2.0 \sigma$  (blue mesh) and  $\sim 5.0 \sigma$  (magenta transparent surface)]. **H-I.** An additional BCD-pB17 data set (not shown) was collected at the zinc *K* X-ray absorption edge ( $\lambda = 1.283 \text{ \AA}$ ) at a resolution of 2.7 Å. This was used to calculate an anomalous difference Fourier map with phases derived from the final BCD-pB17 model. **H** and **I** show clear peaks for the two structural zinc ions in the asymmetric unit, one in each McbB subunit (map contoured at  $\sim 4.0 \sigma$ ).

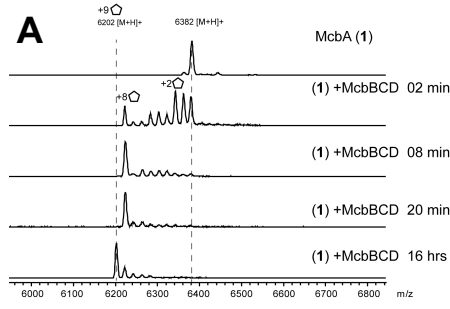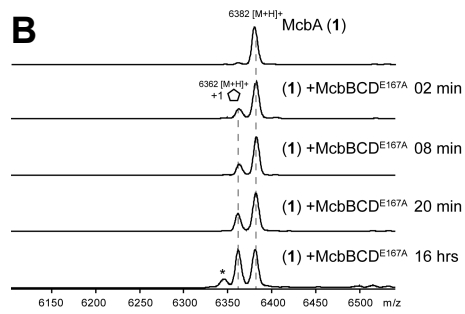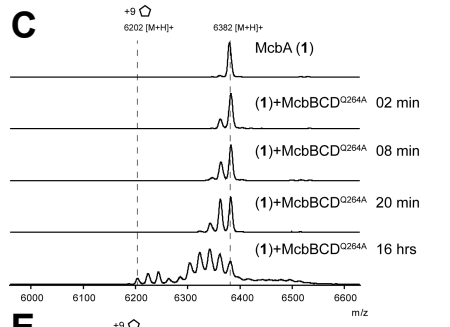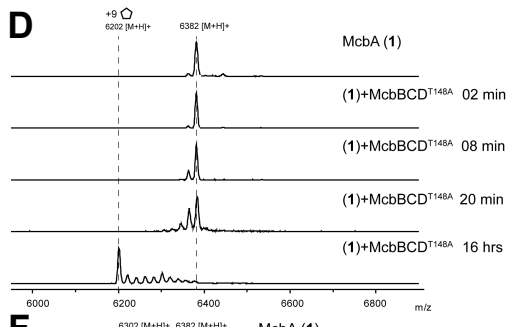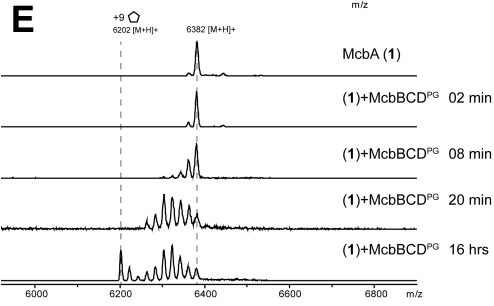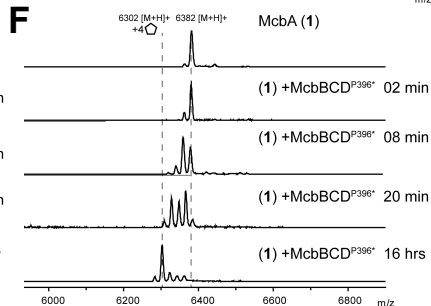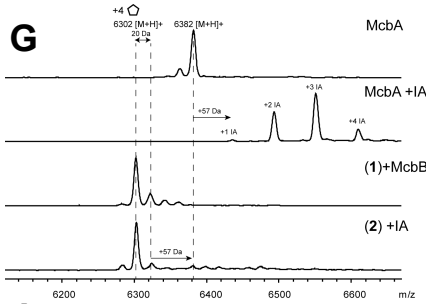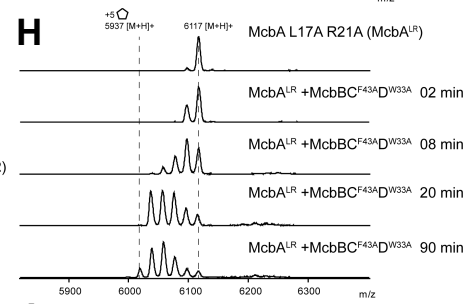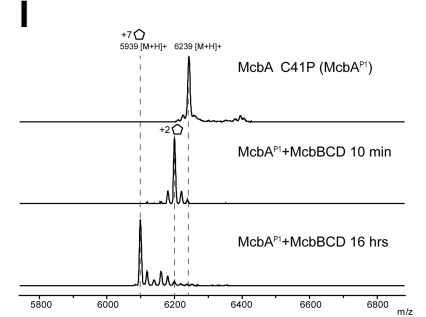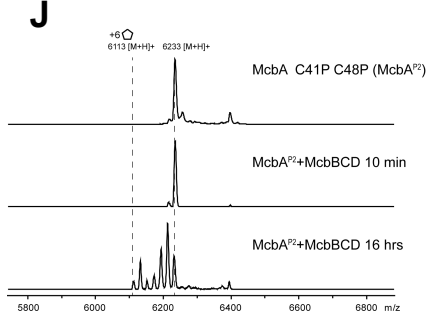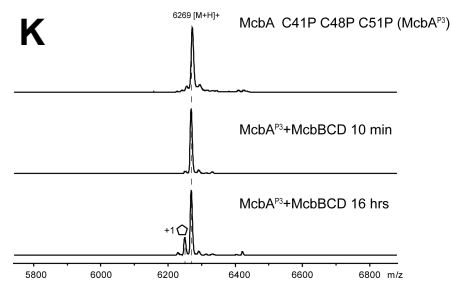

## Supplementary Figure S4. Mass-spectrometry data. (Related to Figure 5)

McbBCD heterocyclisation reactions. For each reaction, 10  $\mu$ M of peptide and 1  $\mu$ M of enzyme were mixed and incubated at 37°C. Aliquots were taken at the indicated time points, quenched and analysed by MALDI for heterocycle formation. A 20 Da mass loss corresponds to the formation of one azole. In each case, the maximum number of detected heterocycles after overnight incubation is indicated.

**A. Time-course of McbA modification by *wt* McbBCD.**

**B. Time-course of McbA modification by McbBCD<sup>E167A</sup>.** An asterisk denotes laser-induced (-15 Da) MALDI artefact.

**C. Time-course of McbA modification by McbBCD<sup>Q264A</sup>.**

**D. Time-course of McbA modification by McbBCD<sup>T148A</sup>.**

**E. Time-course of McbA modification by McbBCD<sup>PG</sup> (P394G P396G).**

**F. Time-course of McbA modification by McbBCD<sup>P396\*</sup> (P396\*).**

**G. Evidence that McbBCD<sup>P396\*</sup> produces a 4-thiazole containing intermediate.** An incubation of a *wt* McbA peptide (**1**) with iodoacetamide (IA) produces a mixture of 1 to 4 IA adducts (+57 Da mass shift), corresponding to the maximum number of Cys residues in the precursor. A treatment of (**1**) with McbBCD<sup>P396\*</sup> yields a 4-cycle-containing compound (**2**). (**2**) cannot be further labelled with IA, indicating that all four cysteines in (**2**) are cyclised. Shown is MALDI analysis of reaction products.

**H. Time-course of McbA<sup>LR</sup> modification by McbBC<sup>F43A</sup>D<sup>W33A</sup>.**

**I-K. Time-courses of modification of McbA Pro mutants.** A Cys41Pro (**i**), Cys41Pro Cys48Pro (**j**) or Cys41Pro Cys48Pro Cys51Pro (**k**) precursor peptides were incubated with McbBCD for indicated periods of time and reaction products analysed with MALDI. Maximum number of heterocycles detected is indicated.

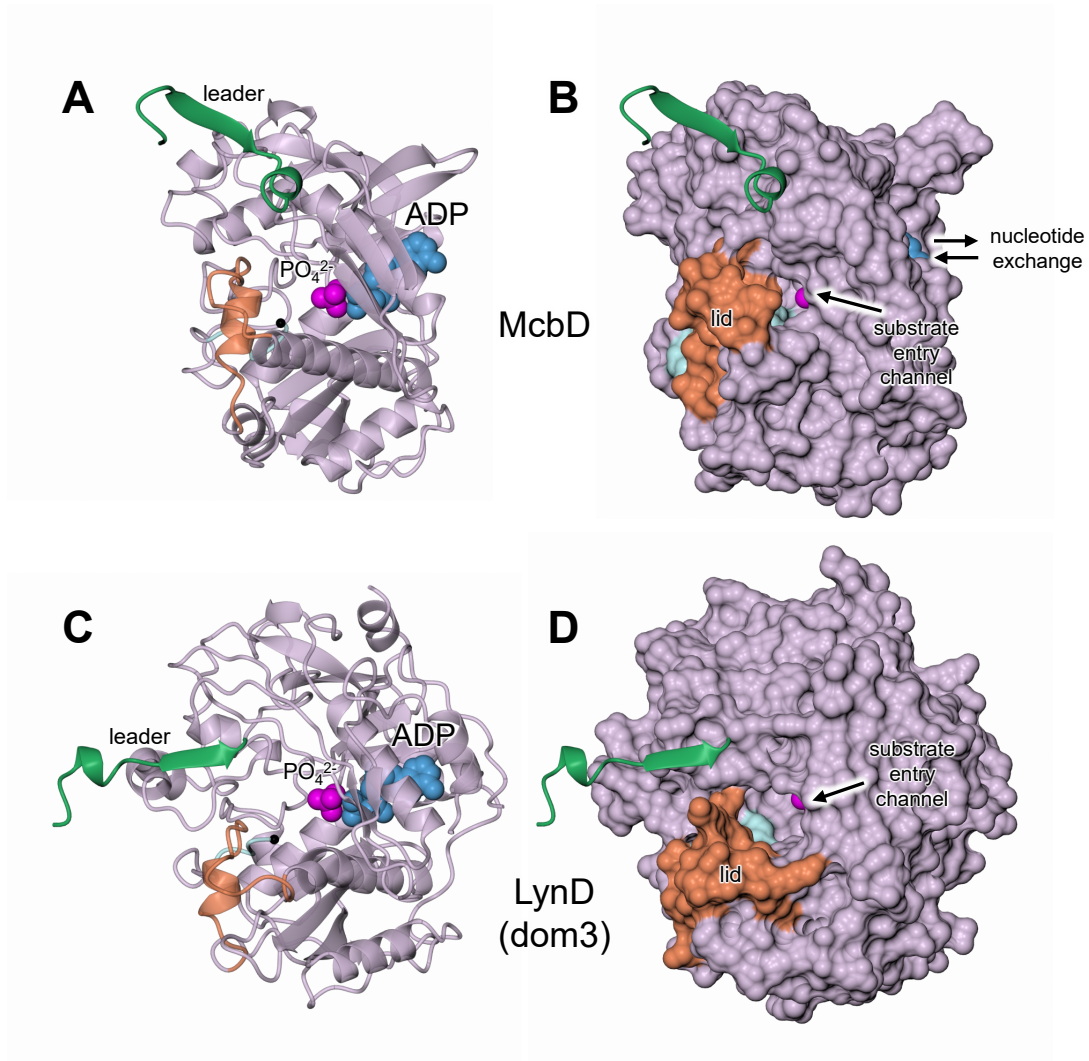

**Supplementary Figure S5. Further detail of the McbD structure. Related to Figure 5**

**A** and **B** show the isolated McbD subunit (from the side with respect to the standard view, which is shown in **Figure 5**) in cartoon and molecular surface representations. Also shown is the relative position of the leader peptide (green) and, as van der Waals spheres, the bound ADP (blue) and phosphate (magenta). The lid region (orange) and C-terminal tail (cyan) partially occlude the active site, although the phosphate is just visible through a pore that we designate the entry channel. **B** and **C** show corresponding views of domain 3 of LynD. Here the lid adopts a more open conformation allowing less restricted access to the active site.



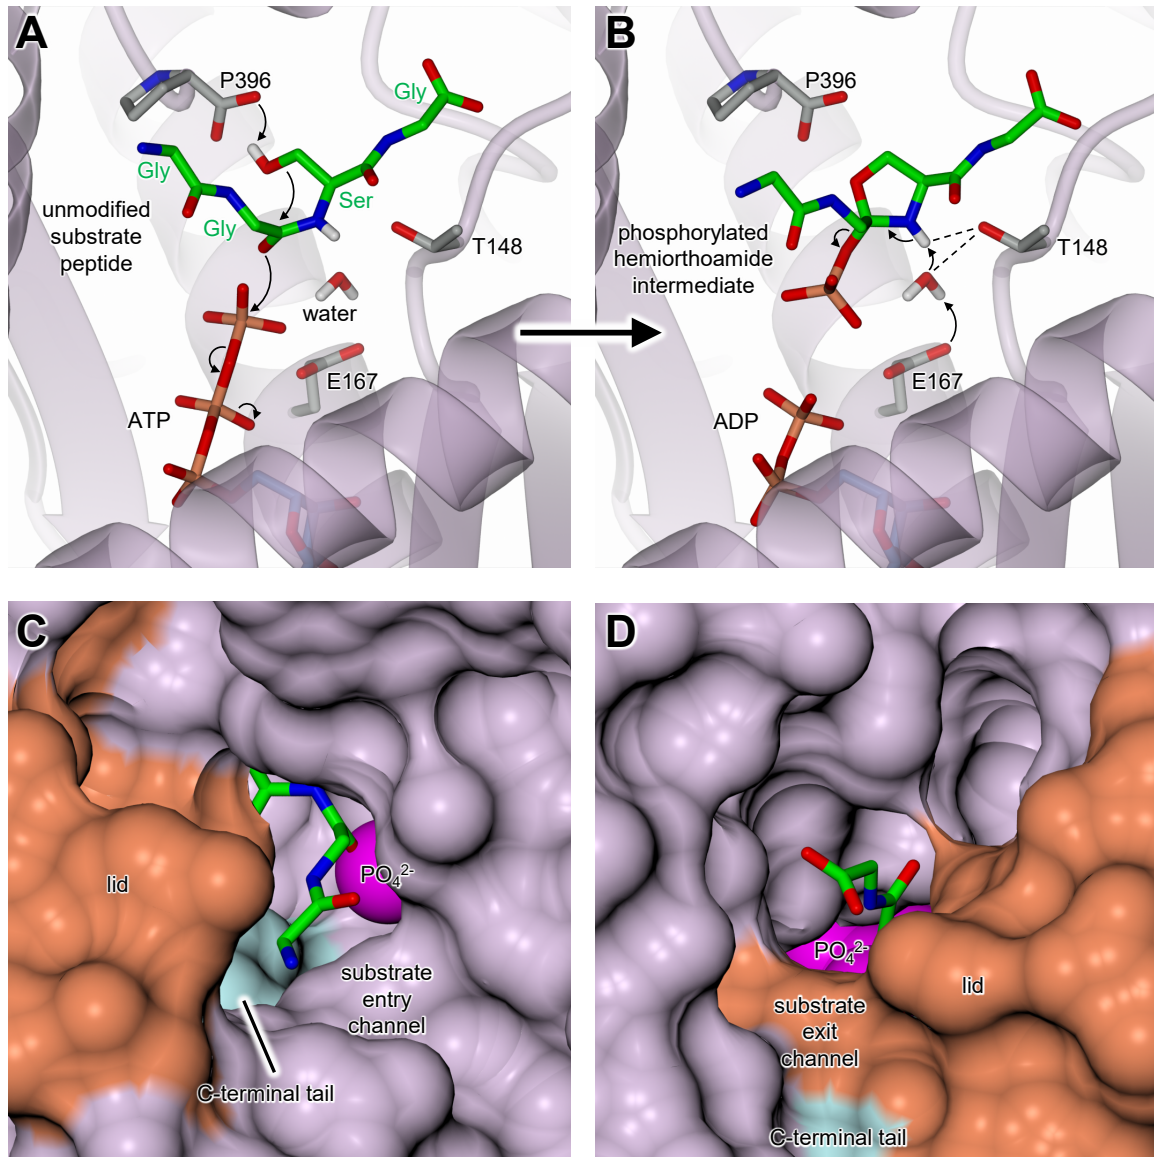

**Supplementary Figure S6. Modelling of complexes with substrate and intermediate. Related to Figure 5 and STAR Methods**

**A** and **B** show modelled substrate and intermediate complexes of McbD, respectively, starting from a Gly-Gly-Ser-Gly peptide. Also shown are key McbD residues, including Pro396 and Thr148, where mutations to both have deleterious effects on catalysis. The proposed mechanism for heterocyclization involves two bases (**Figure 5F**). We postulate that Pro396 is the first of these, but that Thr148 is not an obvious candidate for the second. Instead, we propose that a water molecule performs this role after deprotonation by Glu167. The latter was not mutated as it is also a magnesium ligand. We further suggest that Thr148 is important for the correct positioning of this water and possibly also has a role in substrate binding. **C** and **D** show how the N-terminal and C-terminal ends of the docked substrate (shown in panel **A**) are directed towards the entry and exit channels of McbD, respectively.

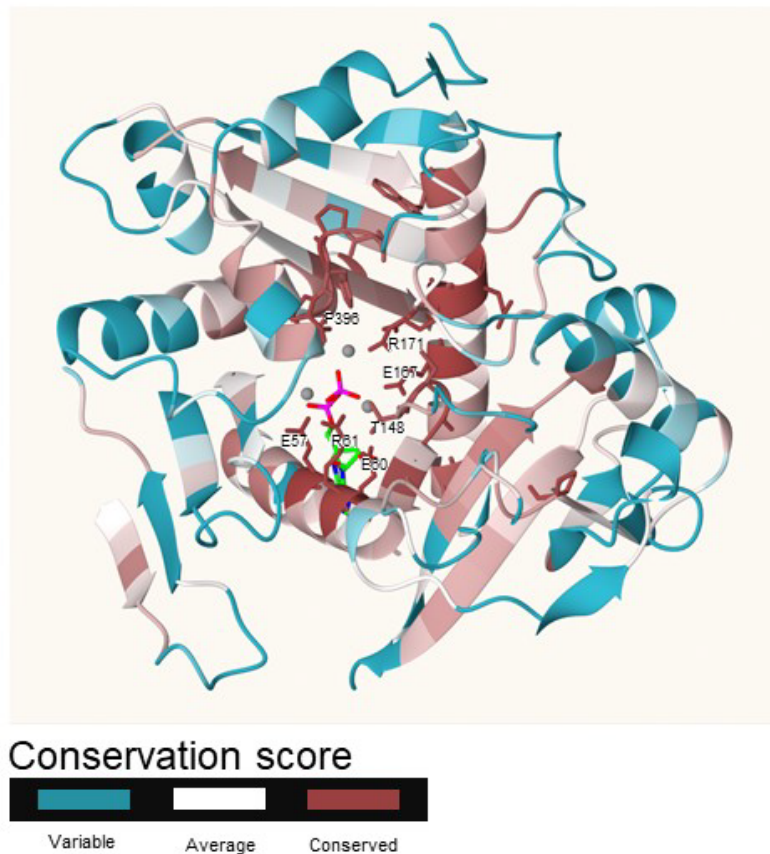

**Supplementary Figure S7. Conserved amino-acid residues in the vicinity of the McbD active centre. Related to Figure 5** McbD model was submitted to ConSurf (<http://consurf.tau.ac.il/>) server. A HMMER search for homologous templates was performed using UNIREF90 database to construct final multiple sequence alignment. Calculated conservation scores were used to paint a cartoon representation of McbD structure with most conserved amino-acids shown as tan cylinders and labelled in the figure. Also shown are ADP and three magnesium ions.

**Supplementary Table S1. Site occupancy in McbBCD structures. Related to Table 2**

| Structure      | Treatment                             | Peptide clamp                                          | LHW pocket         | RF sandwich        | McbC active site      | McbD active site                     | Adjacent to R199 and R203 (McbB1)* | Crystal contact adjacent to T91 (McbB2)* |
|----------------|---------------------------------------|--------------------------------------------------------|--------------------|--------------------|-----------------------|--------------------------------------|------------------------------------|------------------------------------------|
| BCD-pB17       | as isolated                           | K4-Q22                                                 | OTZ39-G40          | TOZ49              | G55-OAZ56-G57-S58-H59 | glycerol                             | sulphate                           | unassigned density                       |
| BCD-pB17-ADP-P | as isolated, co-crystallised with ATP | A5-R21                                                 | unassigned density | Unassigned density | OAZ56-G57-S58-H59     | ADP, phosphate, 3 x Mg <sup>2+</sup> | sulphate                           | ATP (0.5 occupancy)                      |
| BCD-pB17short  | as isolated with truncated pro-McbB17 | K4-Q22                                                 | unassigned density | OTZ39              | ethylene glycol,      | glycerol                             | sulphate                           | unassigned density                       |
| BCD-free       | TldD/E-treated – no pro-McbB17        | M213 (McbB2) moves into site occupied by L12 of leader | unassigned density | empty              | sulphate              | empty                                | sulphate                           | empty                                    |

\*Probably not a biologically relevant site

N.B. for each structure the asymmetric unit contains one FMN cofactor (in the McbC active site) and two Zn<sup>2+</sup> ions (one associated with each copy of McbB).

**Supplementary Table S2. Oligonucleotides used in this study. Related to STAR Methods**

| Name                   | Sequence                                                  | Purpose                                                                      |                     |
|------------------------|-----------------------------------------------------------|------------------------------------------------------------------------------|---------------------|
| McbANcoHis             | AATTTACCATGGGACATCACCATCACCATCATATGG<br>AATTTAAAAGCGAGTGA | Construction of pBAD Ec-McB-His                                              |                     |
| McbASmaRev             | TTAACCCGGGCATTACTGAAAAGATGTGGAAC                          |                                                                              |                     |
| 46stopF                | GGTCAAGGTGGCTGATGTGGTGGTTGC                               | Construction of pBAD Ec-McB-His 1-46                                         |                     |
| 46stopR                | GCAACCACCACATCAGCCACCTTGACC                               |                                                                              |                     |
| McbB_pBAD_HisB_XhoI_F  | ATATACTCGAGCATGGTGCTCCCTGATATTA<br>GGAAAAG                | Subcloning of <i>mcbBCD</i> fragment to produce pBAD <i>mcbBCD</i>           |                     |
| McbD_pBAD_HisB_EcoRI_R | ATATAGAATTCTTATGGGAATGGTACCATCTTTGATTCTC                  |                                                                              |                     |
| McbA_L17A_R21A_F       | TGCTAAATTATCAGCCAGTCTCCATTAGGTGTTGG                       | Mutagenesis of <i>mcbA</i> and cloning of mutated genes into pET28MBP vector |                     |
| McbA_L17A_R21A_R       | TGGGCTGATAATTTAGCAGCATCAACGGACAAAAC                       |                                                                              |                     |
| McbA_C41P_F            | GGCGGCGGCGGTAGCCCGGGTGGTC                                 |                                                                              |                     |
| McbA_C41P_R            | GACCACCCGGGCTACCGCCGCGCC                                  |                                                                              |                     |
| McbA_C48P_C51P_F       | TGGCGGTCCTGGTGGTCCGAGCAACGGT                              |                                                                              |                     |
| McbABamFor             | TAATATGGATCCATGGAATTTAAAAGCGAGTG                          |                                                                              |                     |
| McbANotRev             | TAATATGCGGCCGCTCAGATATGTGAACCACTT C                       |                                                                              |                     |
| McbD_E167A_F           | AGGTCCTTGTGTGCATTTATGG                                    |                                                                              | Mutagenesis of McbD |
| McbD_E167A_R           | CCATAAATGCACACAAGGAACC                                    |                                                                              |                     |
| McbD_Q264A_F           | TTGTGGGCATCGTATATATGCC                                    |                                                                              |                     |
| McbD_Q264A_R           | GCATATATACGATGCCCAACAATTCC                                |                                                                              |                     |
| McbD_W33A_R            | ATACGCTCATAGTCCGCTATCTGAGAAAACG                           |                                                                              |                     |
| McbD_W33A_F            | CAACGTTTTCTCAGATAGCGGACTATGAGCG                           |                                                                              |                     |

|                       |                                                          |  |                     |
|-----------------------|----------------------------------------------------------|--|---------------------|
| McbD_T148A_R          | CTACATCCGCATGCATCTCTGTCAGG                               |  |                     |
| McbD_T148A_F          | CTGACAGAGATGCATGCCGATGTAG                                |  |                     |
| McbD_minusPro_EcoR1_R | ATATAGAATTCTTAGAATGGTACCATCTTTGAT<br>TCTCTGAC            |  |                     |
| McbD_PtoG_EcoR1_R     | ATATAGAATTCTTATCCGAATCCTACCATCTTT<br>GATTCTCTGACTTTAATAC |  |                     |
| McbC_F43A_R           | CGCGGACACGGCAGTTCGTTCAGC                                 |  | Mutagenesis of McbC |
| McbC_F43A_F           | GCTGAACGAACTGCCGTGTCCGCG                                 |  |                     |
| Y202Af                | TGAAAAAGCTTTGTTCAAAGCACGCTACAGAG                         |  |                     |
| Y202Ar                | CTCTGTAGCGTGCTTTGAACAAAGCTTTTCA                          |  |                     |
|                       |                                                          |  |                     |
